# Supplementary material for: Viral species richness and composition in young children with loose or watery stool in Ethiopia
Source: PubMed Central journal article supplement (PMC6332554; doi:10.1186/s12879-019-3674-3), 2019-01-14
Supplement: 12879_2019_3674_MOESM2_ESM.pdf [file 12879_2019_3674_MOESM2_ESM.pdf]

Table S1: Prevalence of species/genotype by mBSFS-C stool consistency category

| N pools (children)                         | Watery<br>N=4 (29) | Loose<br>N=8(79) | Smooth<br>N=6(59) | Lumpy<br>N=9(88) | Pellets<br>N=2(14) | Overall<br>N=29(269) |
|--------------------------------------------|--------------------|------------------|-------------------|------------------|--------------------|----------------------|
| Adeno-associated dependoparvovirus A, AAV2 | 3 (75%)            | 0 (0%)           | 1 (16.7%)         | 0 (0%)           | 0 (0%)             | 4 (13.8%)            |
| Aichivirus A                               | 1 (25%)            | 2 (25%)          | 0 (0%)            | 1 (11.1%)        | 0 (0%)             | 4 (13.8%)            |
| Anellovirus                                | 3 (75%)            | 3 (37.5%)        | 2 (33.3%)         | 2 (22.2%)        | 0 (0%)             | 10 (34.5%)           |
| Bufavirus 3                                | 1 (25%)            | 0 (0%)           | 1 (16.7%)         | 0 (0%)           | 0 (0%)             | 2 (6.9%)             |
| Cosavirus A                                | 1 (25%)            | 4 (50%)          | 2 (33.3%)         | 2 (22.2%)        | 0 (0%)             | 9 (31%)              |
| Cosavirus D                                | 0 (0%)             | 1 (12.5%)        | 0 (0%)            | 0 (0%)           | 0 (0%)             | 1 (3.4%)             |
| Cosavirus E                                | 1 (25%)            | 0 (0%)           | 0 (0%)            | 0 (0%)           | 0 (0%)             | 1 (3.4%)             |
| Cosavirus E/D                              | 0 (0%)             | 0 (0%)           | 1 (16.7%)         | 1 (11.1%)        | 0 (0%)             | 2 (6.9%)             |
| Enterovirus A, Coxsackievirus A14          | 0 (0%)             | 0 (0%)           | 0 (0%)            | 1 (11.1%)        | 0 (0%)             | 1 (3.4%)             |
| Enterovirus A, Coxsackievirus A16          | 1 (25%)            | 2 (25%)          | 0 (0%)            | 0 (0%)           | 0 (0%)             | 3 (10.3%)            |
| Enterovirus A, Coxsackievirus A6           | 0 (0%)             | 1 (12.5%)        | 0 (0%)            | 2 (22.2%)        | 0 (0%)             | 3 (10.3%)            |
| Enterovirus B, Echovirus E14               | 0 (0%)             | 0 (0%)           | 1 (16.7%)         | 1 (11.1%)        | 0 (0%)             | 2 (6.9%)             |
| Enterovirus B, Echovirus E16               | 1 (25%)            | 1 (12.5%)        | 0 (0%)            | 0 (0%)           | 0 (0%)             | 2 (6.9%)             |
| Enterovirus B, Echovirus E18               | 0 (0%)             | 1 (12.5%)        | 1 (16.7%)         | 1 (11.1%)        | 0 (0%)             | 3 (10.3%)            |
| Enterovirus B, Echovirus E19               | 1 (25%)            | 0 (0%)           | 1 (16.7%)         | 0 (0%)           | 0 (0%)             | 2 (6.9%)             |
| Enterovirus B, Echovirus E27               | 0 (0%)             | 1 (12.5%)        | 0 (0%)            | 0 (0%)           | 0 (0%)             | 1 (3.4%)             |
| Enterovirus B, Echovirus E6                | 0 (0%)             | 0 (0%)           | 1 (16.7%)         | 1 (11.1%)        | 0 (0%)             | 2 (6.9%)             |
| Enterovirus C, Coxsackievirus A1           | 0 (0%)             | 1 (12.5%)        | 0 (0%)            | 0 (0%)           | 0 (0%)             | 1 (3.4%)             |
| Enterovirus C, Coxsackievirus A13          | 0 (0%)             | 0 (0%)           | 0 (0%)            | 1 (11.1%)        | 0 (0%)             | 1 (3.4%)             |
| Enterovirus C, Coxsackievirus A17          | 0 (0%)             | 1 (12.5%)        | 1 (16.7%)         | 1 (11.1%)        | 1 (50%)            | 4 (13.8%)            |
| Enterovirus C, Coxsackievirus A20          | 0 (0%)             | 2 (25%)          | 2 (33.3%)         | 0 (0%)           | 0 (0%)             | 4 (13.8%)            |
| Enterovirus C, Enterovirus C99             | 0 (0%)             | 0 (0%)           | 1 (16.7%)         | 1 (11.1%)        | 0 (0%)             | 2 (6.9%)             |
| Hepatovirus A, Hepatovirus A <sub>IB</sub> | 0 (0%)             | 2 (25%)          | 2 (33.3%)         | 0 (0%)           | 0 (0%)             | 4 (13.8%)            |
| Human bocaparvovirus 1, Human bocavirus 1  | 0 (0%)             | 0 (0%)           | 0 (0%)            | 1 (11.1%)        | 0 (0%)             | 1 (3.4%)             |
| Human bocaparvovirus 1, Human bocavirus 3  | 1 (25%)            | 0 (0%)           | 0 (0%)            | 1 (11.1%)        | 0 (0%)             | 2 (6.9%)             |
| Human bocaparvovirus 2, Human bocavirus 2  | 1 (25%)            | 2 (25%)          | 1 (16.7%)         | 1 (11.1%)        | 0 (0%)             | 5 (17.2%)            |
| Human bocaparvovirus 2, Human bocavirus 4  | 1 (25%)            | 0 (0%)           | 0 (0%)            | 0 (0%)           | 1 (50%)            | 2 (6.9%)             |
| Human mastadenovirus A                     | 1 (25%)            | 1 (12.5%)        | 1 (16.7%)         | 2 (22.2%)        | 0 (0%)             | 5 (17.2%)            |
| Human mastadenovirus C                     | 1 (25%)            | 1 (12.5%)        | 1 (16.7%)         | 0 (0%)           | 0 (0%)             | 3 (10.3%)            |
| Human mastadenovirus D                     | 0 (0%)             | 2 (25%)          | 2 (33.3%)         | 0 (0%)           | 0 (0%)             | 4 (13.8%)            |
| Human mastadenovirus F                     | 1 (25%)            | 0 (0%)           | 0 (0%)            | 0 (0%)           | 0 (0%)             | 1 (3.4%)             |
| Human picobirnavirus                       | 0 (0%)             | 1 (12.5%)        | 0 (0%)            | 1 (11.1%)        | 0 (0%)             | 2 (6.9%)             |
| Norwalk virus, Norovirus GI                | 0 (0%)             | 3 (37.5%)        | 1 (16.7%)         | 2 (22.2%)        | 0 (0%)             | 6 (20.7%)            |
| Norwalk virus, Norovirus GII               | 2 (50%)            | 3 (37.5%)        | 0 (0%)            | 0 (0%)           | 0 (0%)             | 5 (17.2%)            |
| Parechovirus A, Human parechovirus 1       | 1 (25%)            | 2 (25%)          | 2 (33.3%)         | 1 (11.1%)        | 1 (50%)            | 7 (24.1%)            |
| Parechovirus A, Human parechovirus 17      | 0 (0%)             | 0 (0%)           | 0 (0%)            | 1 (11.1%)        | 0 (0%)             | 1 (3.4%)             |
| Parechovirus A, Human parechovirus 4       | 1 (25%)            | 0 (0%)           | 0 (0%)            | 0 (0%)           | 0 (0%)             | 1 (3.4%)             |
| Parechovirus A, Human parechovirus 5       | 0 (0%)             | 1 (12.5%)        | 0 (0%)            | 0 (0%)           | 0 (0%)             | 1 (3.4%)             |
| Parechovirus A, Human parechovirus 6       | 0 (0%)             | 0 (0%)           | 0 (0%)            | 1 (11.1%)        | 0 (0%)             | 1 (3.4%)             |
| Parechovirus A, Human parechovirus 8       | 0 (0%)             | 0 (0%)           | 0 (0%)            | 1 (11.1%)        | 0 (0%)             | 1 (3.4%)             |
| Salivirus                                  | 2 (50%)            | 1 (12.5%)        | 1 (16.7%)         | 3 (33.3%)        | 1 (50%)            | 8 (27.6%)            |
| Sapporo virus                              | 0 (0%)             | 1 (12.5%)        | 0 (0%)            | 2 (22.2%)        | 0 (0%)             | 3 (10.3%)            |

Number of positive pools (%)

AAV2 = Adeno-associated virus 2
