# Supplementary material for: Viral species richness and composition in young children with loose or watery stool in Ethiopia
Source: PubMed Central journal article supplement (PMC6332554; doi:10.1186/s12879-019-3674-3), 2019-01-14
Supplement: 12879_2019_3674_MOESM3_ESM.pdf [file 12879_2019_3674_MOESM3_ESM.pdf]

Shannon

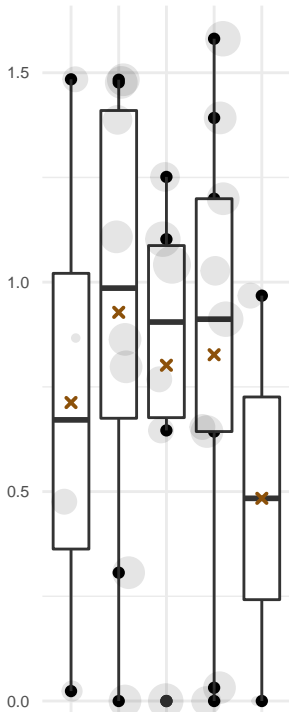

Watery Loose Smooth Lumpy Pellet

Simpson

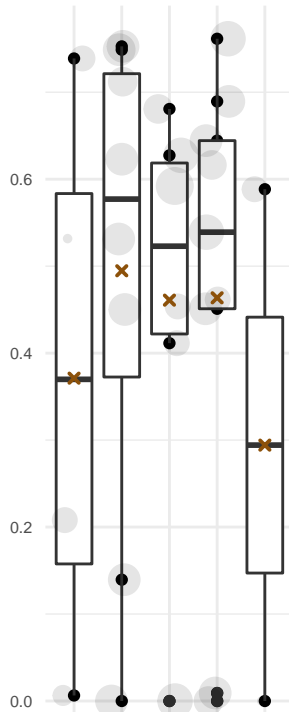

Watery Loose Smooth Lumpy Pellet

Fisher

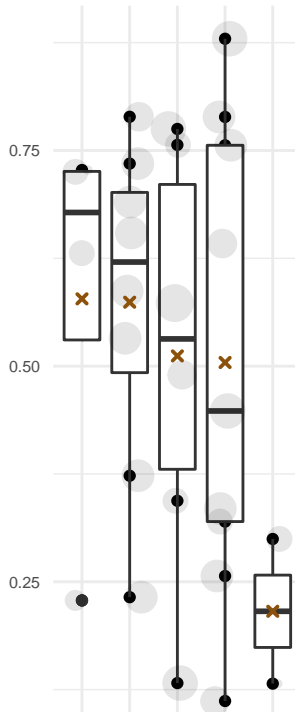

Watery Loose Smooth Lumpy Pellet

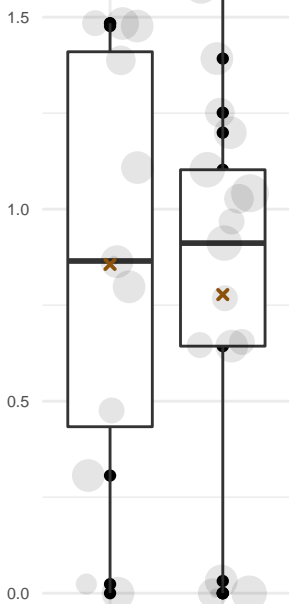

loose/watery

formed

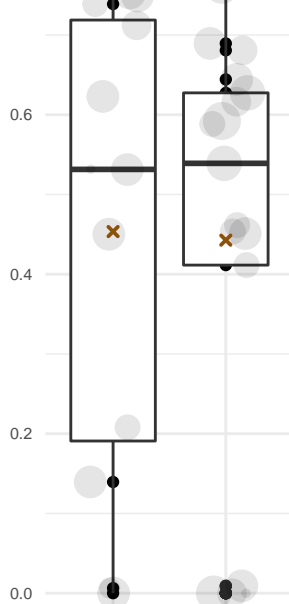

loose/watery

formed

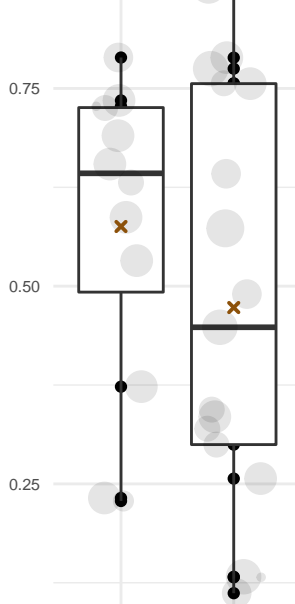

loose/watery

formed

x mean

N kids per pool

6

7

8

9

10

11

12
